# Supplementary material
Source: PubMed Central journal article supplement (PMC2758804)
Supplement: supp_122_20_3729__5.pdf [file supp_122_20_3729__5.pdf]

**Table S1.** Colocalization of epigenetic marks with POLII-Ser2-*P*

| H3 mark             | % Colocalized with<br>POLII-Ser2- <i>P</i> |
|---------------------|--------------------------------------------|
| K4-Me <sub>3</sub>  | 23 ± 4                                     |
| K36-Me <sub>3</sub> | 24 ± 3                                     |
| K27-Me <sub>3</sub> | 13 ± 2                                     |

Indicated histone signal foci were scored for % colocalization with POLII-Ser2-*P* in two-color immunostained ESCs.
