# Supplementary material
Source: PubMed Central journal article supplement (PMC2758804)

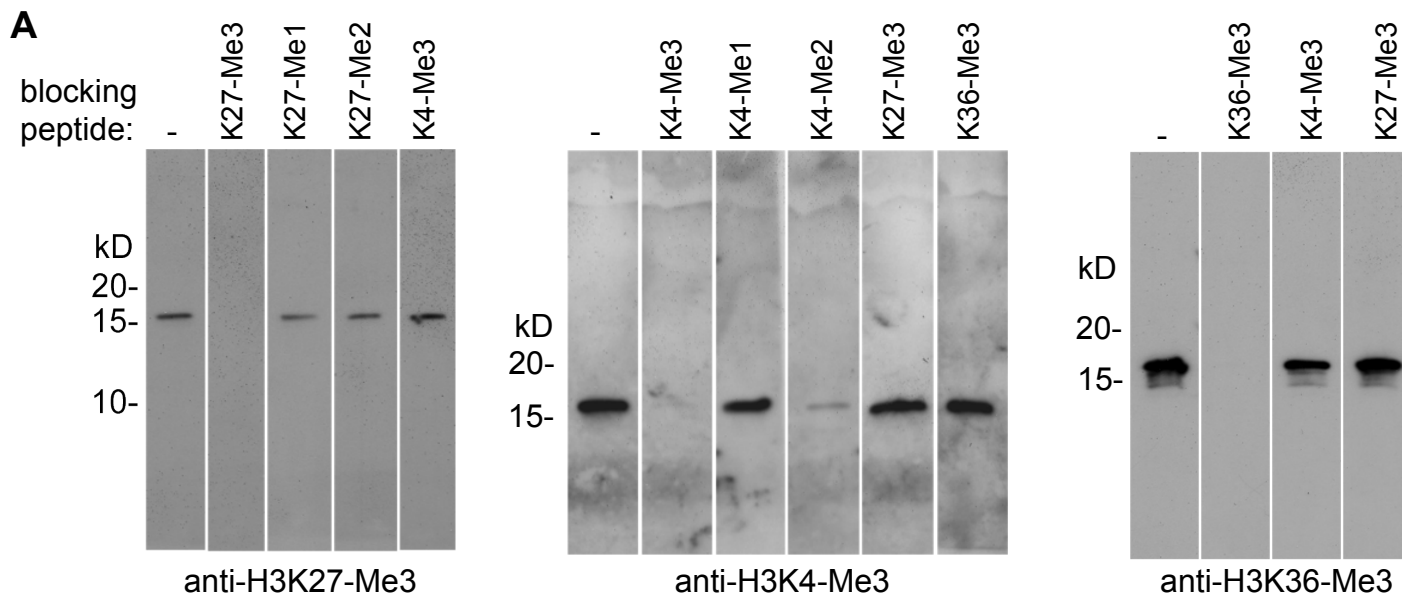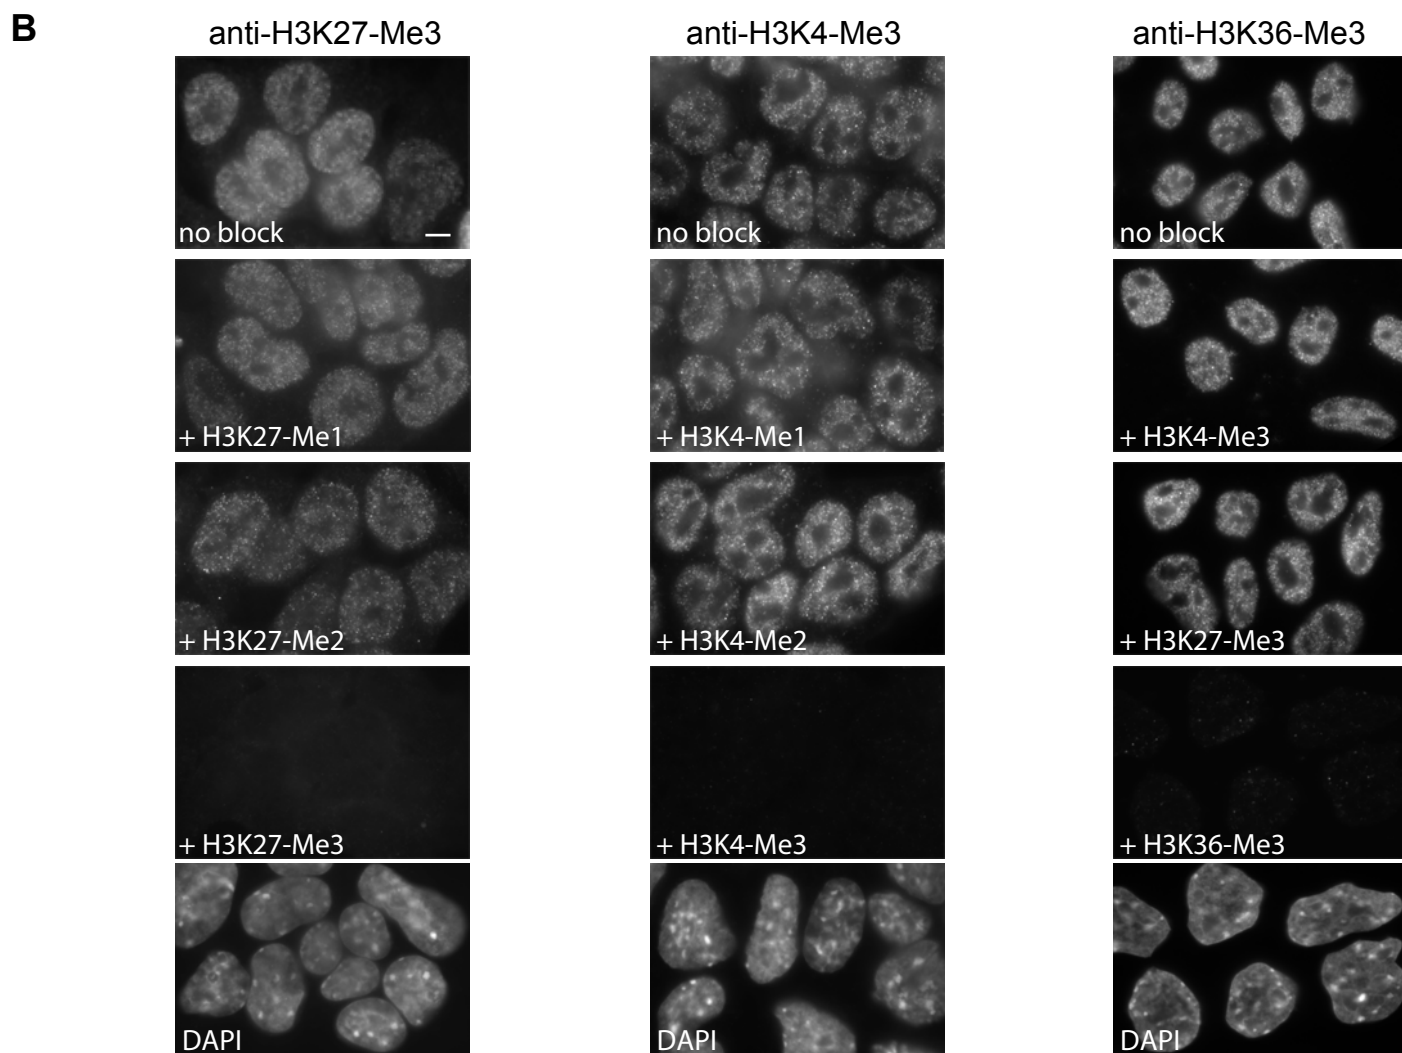

Supplement: supp_122_20_3729__1.pdf [file supp_122_20_3729__1.pdf]

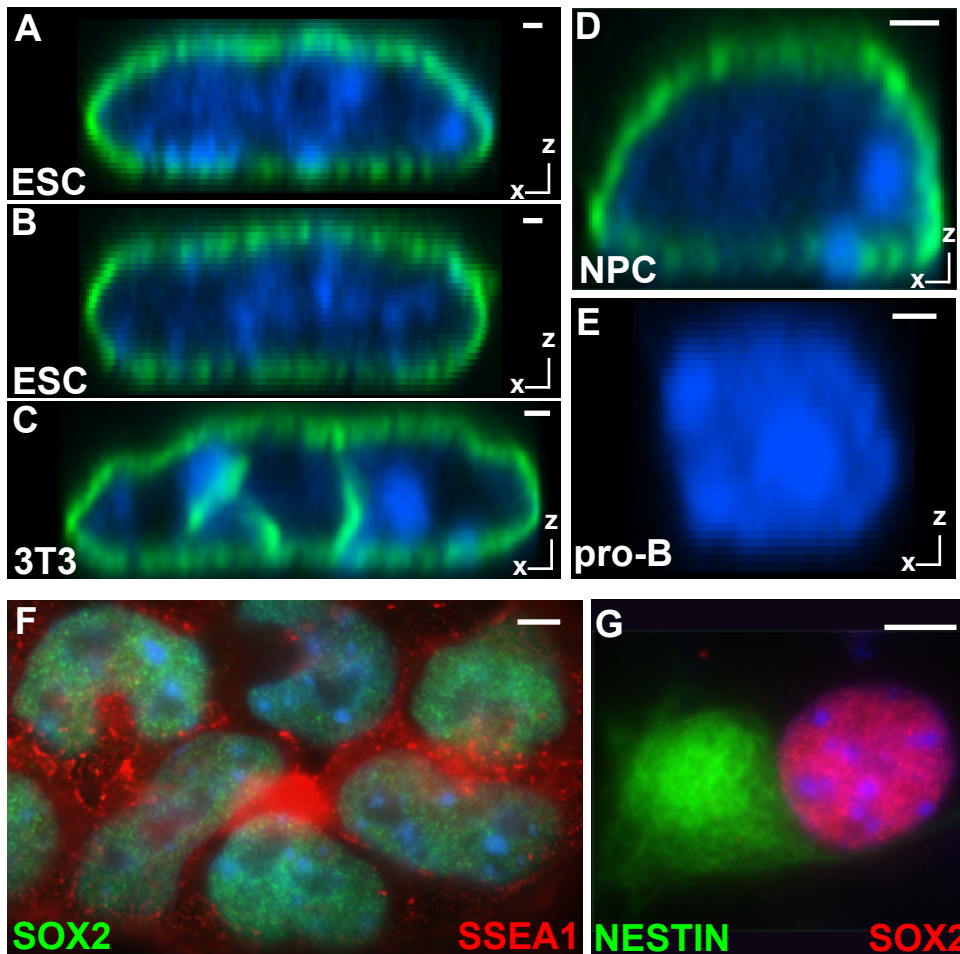

Supplement: supp_122_20_3729__3.pdf [file supp_122_20_3729__3.pdf]

**A**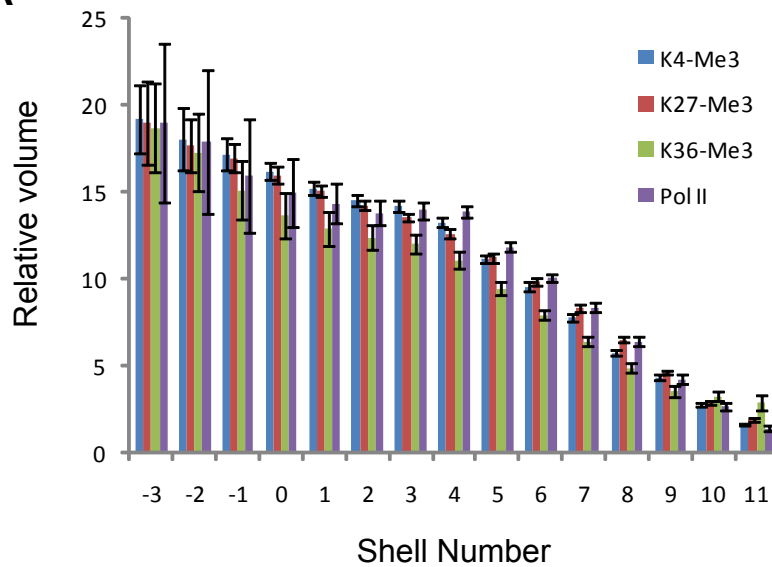**B**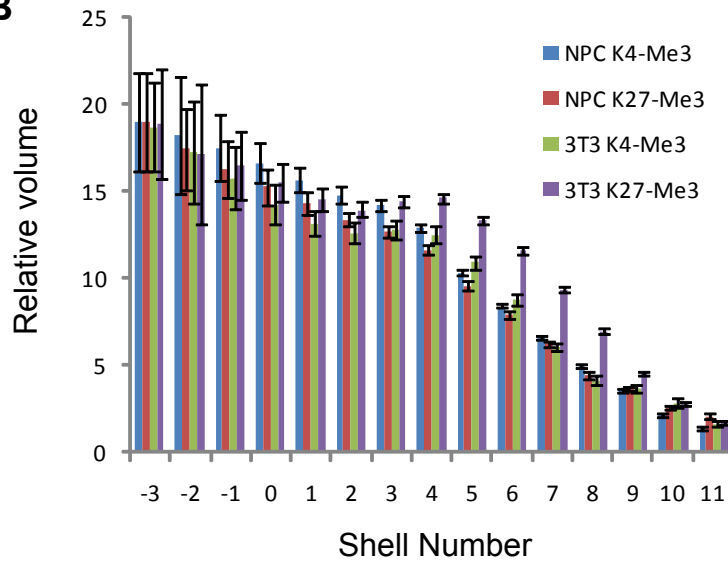

Supplement: supp_122_20_3729__4.pdf [file supp_122_20_3729__4.pdf]
